# Supplementary material
Source: publisher figshare collection journal article supplement (https://gsapubs.figshare.com/ndownloader/files/23708708)
Supplement: Supplementary file 1 [file 23708708]

## Sheet: U-Pb
Table S1: Information of samples of detrital zircon U-Pb age from previous studies
Samples	Locations	Latitude ( N ) longitude ( E )		Lithology	Stratigraphic age	Zircon age numbers	References
Group 1 Western Fujian
FJW1441	Changting	N 25°41'06.6", E 116°07'39.3"		Sandstone	Early Cryogenian	78	Wang et al., 2018d
FJW1445	Changting	N 25°41'44.1", E 116°08'17.4"		Sandstone	Late Cryogenian	53	Wang et al., 2018d
FJW1453	Changting	N 25°45'31.3", E 116°14'25.4"		Sandstone	Early Ediacaran	79	Wang et al., 2018d
FJW1430	Changting	N 25°46'33.3", E 116°16'58.3"		Sandstone	Late Ediacaran	80	Wang et al., 2018d
FJW1428	Changting	N 25°51'24.4", E 116°18'11.1"		Sandstone	Late Cambrian	59	Wang et al., 2018d
FJW1421	Changting	N 25°50'57.6", E 116°19'18.1"		Sandstone	Early Ordovician	60	Wang et al., 2018d
15CT-89	Changting	N 25°41'04", E 116°04'17"		Sandstone	Late Cryogenian	81	Qi et al., 2018
15CT-84	Changting	N 25°41'18", E 116°04'21"		Sandstone	Late Cryogenian	68	Qi et al., 2018
15CT-76	Changting	N 25°41'29", E 116°04'25"		Sandstone	Early Ediacaran	70	Qi et al., 2018
15CT-66	Changting	N 25°45'38", E 116°14'18"		Sandstone	Late Ediacaran	65	Qi et al., 2018
15CT-60	Changting	N 25°45'40", E 116°14'20"		Sandstone	Late Ediacaran	113	Qi et al., 2018
PM02-4	Changting	N 25°59'59", E 116°23'39"		Sandstone	Early Ediacaran	69	Qi et al., 2018
PM02-17	Changting	N 25°60'18", E 119°23'57"		Sandstone	Late Ediacaran	71	Qi et al., 2018
Group 2 Southern Jiangxi
GNW1403	Xunwu	N25°16'58.3", E115°22'50.4"		Sandstone	Early Ediacaran	75	Xue et al., 2019
GNW1433	Xunwu	N24°55'10.6", E115°40'57.7"		Schist	Early Ediacaran	73	Xue et al., 2019
GNW1436	Xunwu	N24°57'46.8", E115°41'44.1"		Schist	Late Ediacaran	74	Xue et al., 2019
GNW1405	Xunwu	N25°12'00.3", E115°19'56.7"		Greywack	Early Cambrian	77	Xue et al., 2019
GNW1440	Xunwu	N25°06'42.9", E115°42'35.9"		Sandstone	Mid Cambrian	68	Xue et al., 2019
J198-1	Dayu	N25°20′19.5″ E114°18′42.5″		Sandstone	Late Ediacaran	107	Wu et al., 2010
J200	Yongxin	N25°24′27.1″ E114°18′36.4″		Sandstone	Early Cambrian	116	Wu et al., 2010
J186	Yongxin	N26°49′36.6″ E114°37′16.4″		Sandstone	Mid Cambrian	139	Wu et al., 2010
J188	Jinggangshan	N26°48′50.0″ E114°26′16.4″		Sandstone	Mid Cambrian	132	Wu et al., 2010
J192	Yongxin	N26°27′15.6″ E114°12′49″		Sandstone	Late Cambrian	139	Wu et al., 2010
D50-2	Chongyi	N25°39'03.20", E114°11'34.83"		Sandstone	Late Ediacaran	83	Xiong et al., 2018
D38-5	Chongyi	N25°41'40.791", E114°16'57.483"		Sandstone	Early Cambrian	83	Xiong et al., 2018
JX-16	Suichuan	N26°21.716′, E114°27.154′		Sandstone	Early Cambrian	33	Wang et al., 2010
JX-12	Jinggangshan	N26°25.244′, E114°13.807′		Sandstone	Late Cambrian	24	Wang et al., 2010
950	Chongyi	N25°45'20″, E114°11'51″		Arkose	Early Ordovician	65	Yao et al., 2011
950-1	Chongyi	N25°45'20″, E114°11'52″		Arkose	Early Ordovician	59	Yao et al., 2011
950-2	Chongyi	N25°45'20″, E114°11'53″		Arkose	Early Ordovician	71	Yao et al., 2011
Group 3 Northern Guangdong and adjacent southeastern corner of Hunan
16ZT-12	Nanxiong	N 25°19'44", E 114°42'32"		Sandstone	Late Cryogenian	85	Qi et al., 2018
16NX-13	Nanxiong	N 25°20'21", E 114°17'58"		Sandstone	Late Ediacaran	78	Qi et al., 2018
SGW1403	Lechang	N24°56'52.4", E113°20'42.6"		Greywack	Late Ediacaran	64	This study
SGW1414	Lechang	N24°56'06.2", E113°17'45.3"		Greywack	Early Cambrian	77	This study
SGW1420	Shaoguan	N24°59'34.0", E113°49'22.2"		Sandstone	Mid Cambrian	59	This study
SGW1434	Nanxiong	N25°14'16.0", E114°11'12.8"		Gneiss	Late Cambrian	72	This study
SGW1425	Shaoguan	N25°00'58.4", E113°51'05.4"		Sandstone	Early Ordovician	78	This study
CZ1	Zhuguangshan			Sandstone	Early Cambrian	82	Wang et al., 2018b
CZ16	Zhuguangshan			Sandstone	Early Cambrian	85	Wang et al., 2018b
CZ26	Zhuguangshan			Siltstone	Early Cambrian	86	Wang et al., 2018b
LN02	Nanxiong			Sandstone	Early Cambrian	82	Wang et al., 2018b
Hu54	Baishui	N26°05.891′, E112°21.713′		Sandstone	Mid Cambrian	45	Wang et al., 2010
10GD17	Renhua	N25°01'28", E113°48'12″		Sandstone	Late Cambrian	100	Yao et al., 2014
10GD19	Renhua	N25°01'46", E113°48'45″		Sandstone	Late Cambrian	97	Yao et al., 2014
10GD48	Yangjiang	N22°04'28", E111°26'45"		Sandstone	Late Cambrian	162	Yao et al., 2014
10GD49-1	Yangjiang	N21°52'53", E111°49'35"		Sandstone	Late Cambrian	175	Yao et al., 2014
Group 4 Central and eastern Guangxi
11FS-1	Nanning			Sandstone	Early Cambrian	72	Xu et al., 2013
11FS-3	Nanning			Sandstone	Early Cambrian	48	Xu et al., 2013
11FS-6	Nanning			Sandstone	Mid Cambrian	61	Xu et al., 2013
11FS-11	Nanning			Sandstone	Late Cambrian	61	Xu et al., 2013
12DQ-4	Wuzhou			Sandstone	Mid Cambrian	68	Xu et al., 2014a
12DQ-9	Wuzhou			Sandstone	Early Ordovician	65	Xu et al., 2014a
12DQ-12	Wuzhou			Comglomerate cobble	Early Ordovician	66	Xu et al., 2014a
12DQ-13	Wuzhou			Sandstone	Early Ordovician	58	Xu et al., 2014a
12DQ-15	Wuzhou			Comglomerate matrix	Early Ordovician	66	Xu et al., 2014a
12DQ-23	Wuzhou			Sandstone	Early Ordovician	84	Xu et al., 2014a
10GD37	Guiping	N23°02'57", L110°13'23"		Siltstone	Early Cambrian	119	Yao et al., 2015
10GD42-1	Guiping	N23°05'05", L110°10'00"		Siltstone	Early Ordovician	118	Yao et al., 2015
10GD41	Guiping	N23°05'28", L110°10'02"		Siltstone	Early Ordovician	119	Yao et al., 2015
10GD38-1	Guiping	N23°06'00", L110°09'43"		Siltstone	Early Ordovician	117	Yao et al., 2015
10GD45	Pinnan	N23°15'25", L110°19'45"		Sandstone	Early Ordovician	99	Yao et al., 2015
